# Supplementary material for: Polymer-assisted formation of 3D Pd nanoassemblies: highly active catalysts for formic acid electrooxidation
Source: Royal Society of Chemistry journal article supplement (doi:10.1039/c7se00031f), 2017-01-01
Supplement: c7se00031f1.pdf [file c7se00031f1.pdf]

## Supporting Information

### **Polymer-assisted formation of 3D Pd nanoassemblies: highly active catalysts for formic acid electro-oxidation**

**Tan Huang<sup>a,b</sup> and Jong-Min Lee<sup>b</sup>**

<sup>a</sup>Energy Research Institute@NTU, Interdisciplinary Graduate School,  
Nanyang Technological University, Singapore;

<sup>b</sup>School of Chemical and Biomedical Engineering, Nanyang Technological University,  
Singapore

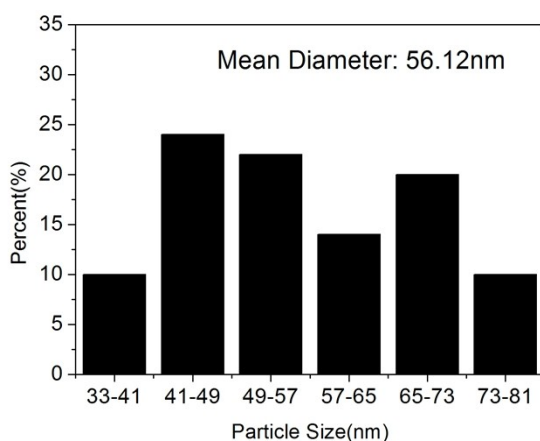

**Figure S1 Pd nanoassemblies size distribution histogram**

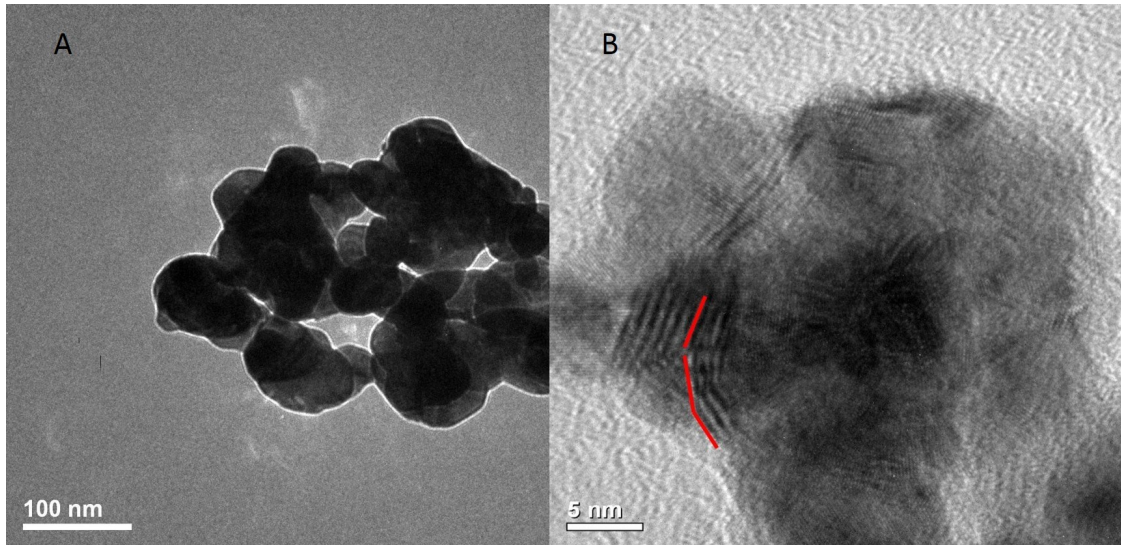

**Figure S2 (A) Pd bulk growing without PAH, (B) HRTEM image showing edge and corner atoms**

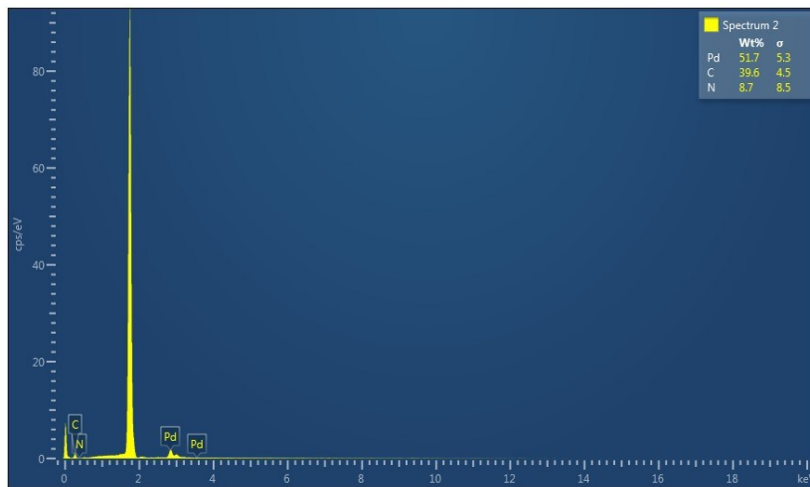

**Figure S3 EDX spectrum of Pd nanoassemblies**

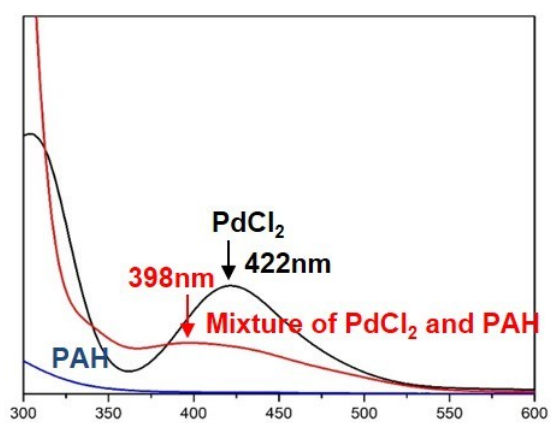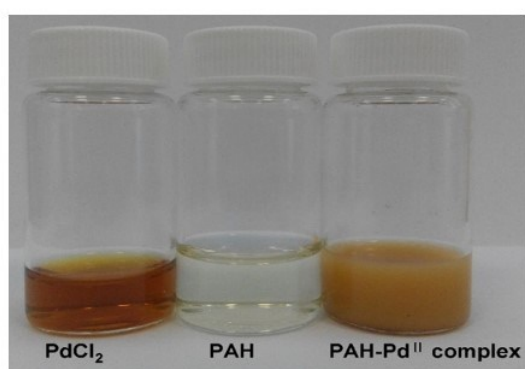

Figure S4 UV-Vis spectrum of solution of PdCl<sub>2</sub>, PAH, PAH-Pd<sup>II</sup> complex.

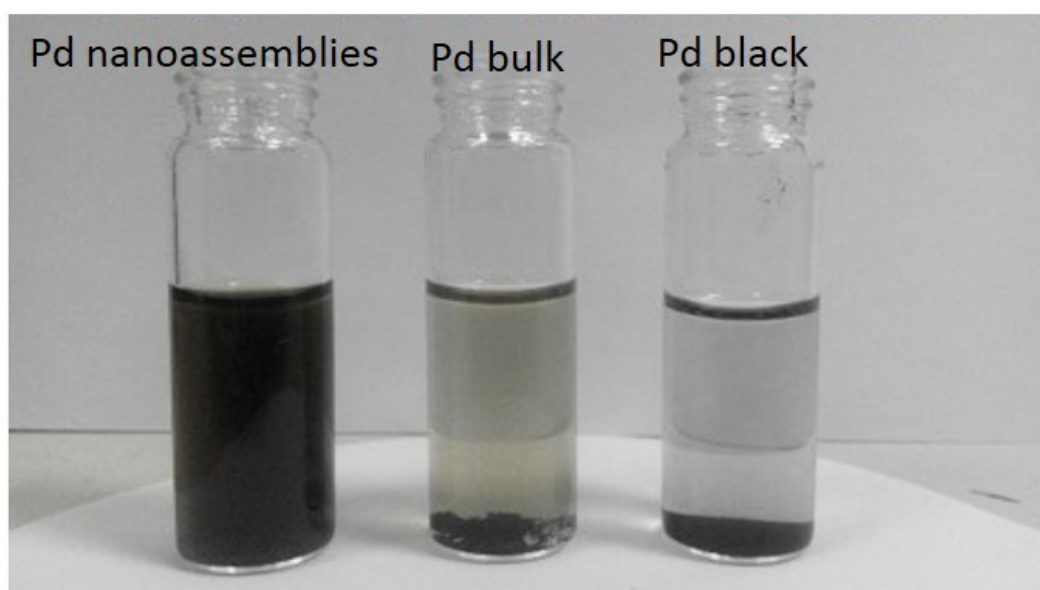

Figure S5 Comparison of dispersity of the three samples: Pd nanoassemblies, Pd bulk, Pd black

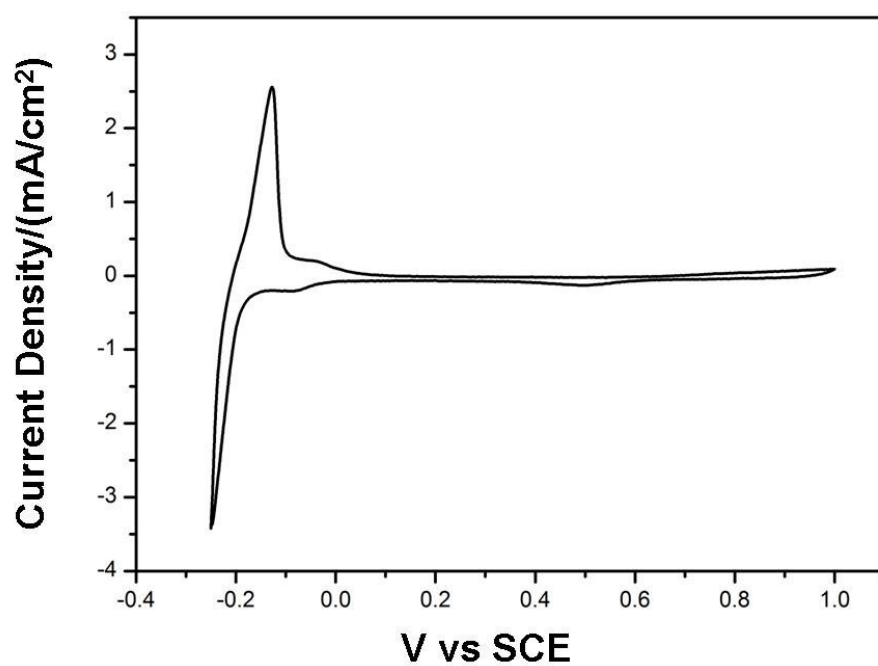

**Figure S6** Cyclic voltammogram of Pd nanoassemblies electrocatalysts coated on a 3 mm diameter glassy carbon electrode in 0.5 M H<sub>2</sub>SO<sub>4</sub> using a Saturated Calomel Electrode as reference electrode and Pt foil as a counter electrode at a scan rate of 50 mV/s

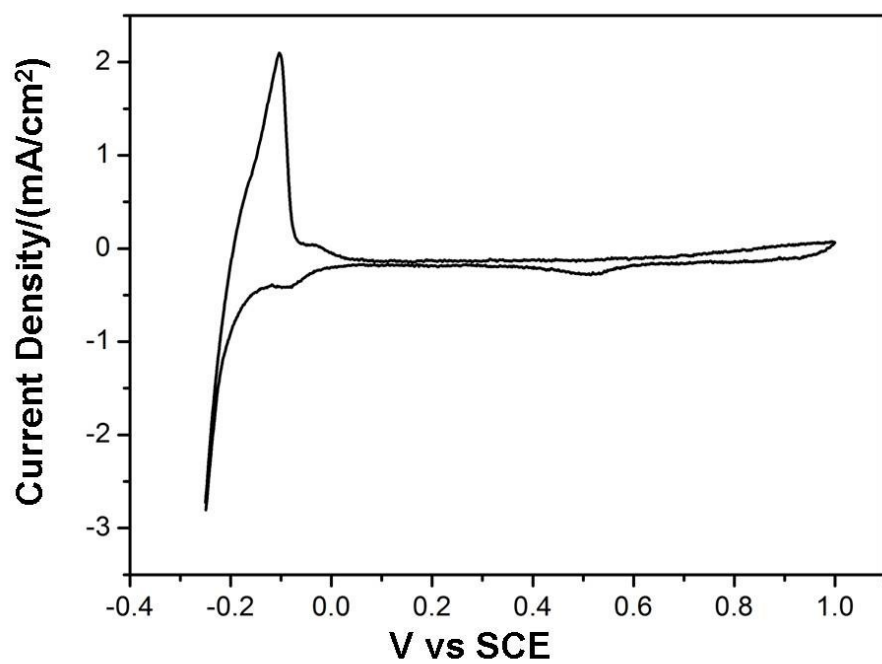

**Figure S7** Cyclic voltammogram of Pd bulk electrocatalysts coated on a 3 mm diameter glassy carbon electrode in 0.5 M H<sub>2</sub>SO<sub>4</sub> using a Saturated Calomel Electrode as reference electrode and Pt foil as a counter electrode at a scan rate of 50 mV/s

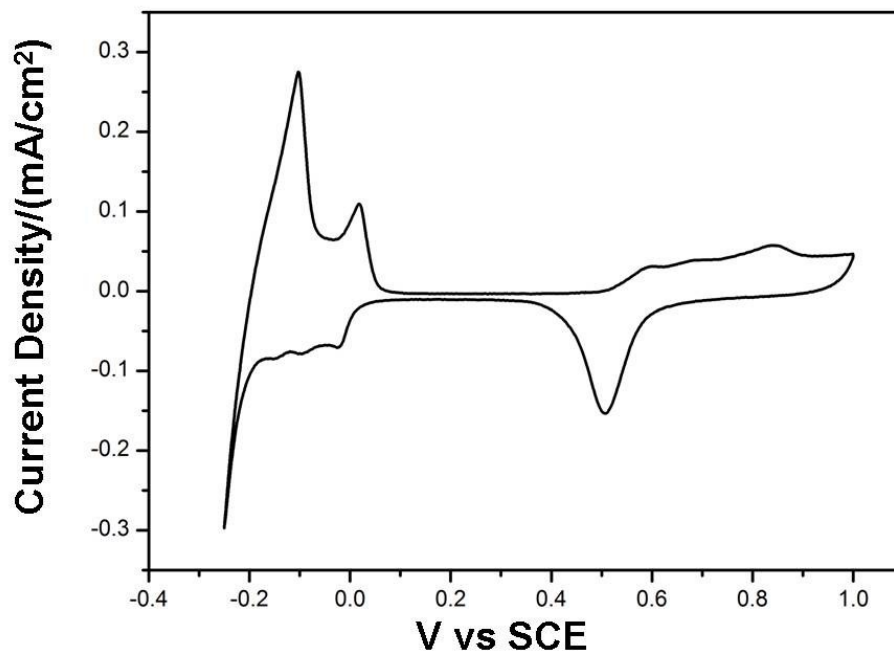

**Figure S8** Cyclic voltammogram of Pd black electrocatalysts coated on a 3 mm diameter glassy carbon electrode in 0.5 M H<sub>2</sub>SO<sub>4</sub> using a Saturated Calomel Electrode as reference electrode and Pt foil as a counter electrode at a scan rate of 50 mV/s
